# Supplementary material for: The return to 1980 stratospheric halogen levels: a moving target in ozone assessments from 2006 to 2022
Source: Copernicus journal article supplement (doi:10.5194/acp-24-13081-2024), 2024-11-27
Supplement: Supplementary file 1 [file acp-24-13081-2024-supplement.pdf]

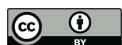

*Supplement of*

## **The return to 1980 stratospheric halogen levels: a moving target in ozone assessments from 2006 to 2022**

**Megan J. Lickley et al.**

*Correspondence to:* Megan J. Lickley ([megan.lickley@georgetown.edu](mailto:megan.lickley@georgetown.edu))

The copyright of individual parts of the supplement might differ from the article licence.

**Table S1:** Return to 1980 dates for mid-latitude EESC

|          | Lickley et al. APCD<br>(Engel et al., 2018 FRFs) | Given in Assessment          |
|----------|--------------------------------------------------|------------------------------|
| WMO 1994 |                                                  | 2045<br>(page 13.13)         |
| WMO 1998 |                                                  | 2048<br>(page 11.21)         |
| WMO 2002 |                                                  | 2043.9<br>(page 1.69 & 1.70) |
| WMO 2006 | 2053.5                                           | 2048.9<br>(page 8.29)        |
| WMO 2010 | 2056.9                                           | 2046.5<br>(page 5.17)        |
| WMO 2014 | 2059.4                                           | 2047.6<br>(page 5.30)        |
| WMO 2018 | 2061.9                                           | 2049.4<br>(page 6.36)        |
| WMO 2022 | 2066                                             | 2066.0<br>(page 416)         |

**Table S2: Sources of incremental changes (in yrs) to EESC 1980 return date using Engel et al. (2018)**

|                                                  | CFC-11 | CFC-12 | Halon-1301 | CCl <sub>4</sub> | Other 12 | Total Change | EESC 1980 Return Date |
|--------------------------------------------------|--------|--------|------------|------------------|----------|--------------|-----------------------|
| 2006 Assessment Initial Return Date              |        |        |            |                  |          |              |                       |
| 2006 Assessment Initial Return Date Engel et al. |        |        |            |                  |          |              | 2053.5                |
| Lifetime Update                                  | +2.2   | +0.1   | +0.3       | +0.9             |          | +3.4         |                       |
| Observed mole fractions since 2006               | -0.6   | +0.3   | +0.3       | +1.0             |          | +1.0         |                       |
| Bank update                                      | +1.8   | +0.8   | +1.4       |                  |          | +3.9         |                       |
| Feedstock emissions                              |        |        |            | +3.1             |          | +3.1         |                       |
| Remaining gases                                  |        |        |            |                  | +1.2     | +1.2         |                       |
| Total updates by gas                             | +3.4   | +1.2   | +1.9       | +5.0             | +1.2     | +12.6        | 2066.1                |
| 2010 Assessment Initial Return Date              |        |        |            |                  |          |              | 2056.9                |
| Lifetime Update                                  | +1.8   | +0.1   | +0.2       | +0.3             |          | +2.6         |                       |
| Observed mole fractions since 2010               | -0.5   | +0.3   | +0.2       | +2.2             |          | +2.2         |                       |
| Bank update                                      | +2.0   | +0.8   | +0.9       |                  |          | +3.7         |                       |
| Feedstock emissions                              |        |        |            | +1.3             |          | +1.3         |                       |
| Remaining gases                                  |        |        |            |                  | -0.5     | -0.5         |                       |
| Total updates by gas                             | +3.3   | +1.2   | +1.3       | +3.8             | -0.5     | +9.2         | 2066.1                |
| 2014 Assessment Initial Return Date              |        |        |            |                  |          |              | 2059.4                |
| Lifetime Update                                  | 0      | 0      | 0          | +0.5             |          | +0.5         |                       |
| Observed mole fractions since 2014               | -0.1   | +0.2   | 0          | +1.3             |          | +1.3         |                       |
| Bank update                                      | +2.2   | +0.7   | +0.7       |                  |          | +3.5         |                       |
| Feedstock emissions                              |        |        |            | +1.2             |          | +1.2         |                       |
| Remaining gases                                  |        |        |            |                  | +0.1     | +0.1         |                       |
| Remaining Updates                                | +2.1   | +0.8   | +0.7       | +2.9             | +0.1     | +6.7         | 2066.1                |
| 2018 Assessment Initial Return Date              |        |        |            |                  |          |              | 2061.9                |
| Lifetime Update                                  | 0      | 0      | 0          | -0.1             |          | -0.1         |                       |
| Observed mole fractions since 2014               | 0      | +0.1   | 0          | +1.0             |          | +1.1         |                       |
| Bank update                                      | +2.3   | +0.7   | +0.7       |                  |          | +3.7         |                       |
| Feedstock emissions                              |        |        |            | -1.7             |          | -1.7         |                       |
| Remaining gases                                  |        |        |            |                  | +1.2     | +1.2         |                       |
| Remaining Updates                                | +2.3   | +0.8   | +0.7       | -0.8             | +1.2     | +4.2         | 2066.1                |

**Table S3:** Atmospheric lifetimes (units of yr) for the 16 principal ODSs, given in each SAOD report

|                                  | WMO 2006 | WMO 2010 | WMO 2014 | WMO 2018 | WMO 2022 |
|----------------------------------|----------|----------|----------|----------|----------|
| CFC-11                           | 45       | 45       | 52       | 52       | 52       |
| CCl <sub>4</sub>                 | 26       | 26       | 26       | 32       | 30       |
| halon-1301                       | 65       | 65       | 72       | 72       | 72       |
| CFC-12                           | 100      | 100      | 102      | 102      | 102      |
| CH <sub>3</sub> Br               | 0.7      | 0.8      | 0.8      | 0.8      | 0.8      |
| CFC-113                          | 85       | 85       | 93       | 93       | 93       |
| halon-2402                       | 20       | 20       | 20       | 28       | 28       |
| HCFC-142b                        | 17.9     | 17.2     | 18       | 18       | 17.1     |
| CH <sub>3</sub> CCl <sub>3</sub> | 5.0      | 5        | 5        | 5        | 5        |
| CFC-114                          | 300      | 190      | 189      | 189      | 189      |
| CFC-115                          | 1700     | 1020     | 540      | 540      | 540      |
| halon-1202                       | 2.9      | 2.9      | 2.9      | 2.5      | 2.5      |
| halon-1211                       | 16       | 16       | 16       | 16       | 16       |
| HCFC-141b                        | 9.3      | 9.2      | 9.4      | 9.4      | 8.81     |
| CH <sub>3</sub> Cl               | 1.0      | 1.0      | 0.9      | 0.9      | 0.9      |
| HCFC-22                          | 12.0     | 11.9     | 11.9     | 11.9     | 11.6     |

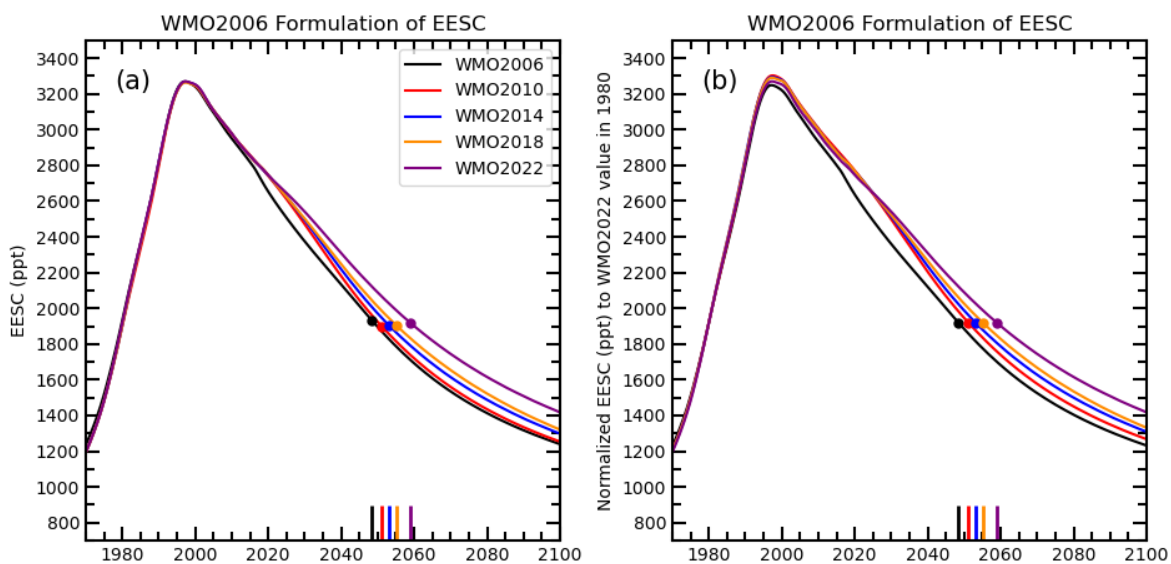

**Figure S1:** EESC calculation for each SAOD from 2006 to 2022 following the Daniel et al. (1995) formulation as it appears in the 2006 SAOD (WMO, 2006).
